# Supplementary material for: Sustainable ocean development policies in Indonesia: paving the pathways towards a maritime destiny
Source: Frontiers journal article supplement (doi:10.3389/fmars.2024.1401332), 2024-09-10
Supplement: Table_1.xlsx [file Table_1.xlsx]

## Sheet: Table-1 Main policy docs
Table 1. The main ocean policies and blue economy documents
Document Title	Year (Period)	Format	Purpose/Objective	Relevant content to Ocean Policy & Blue Economy	Remarks
RPJPN 2005-2025	2007 (2005-2025)	Legislated planning document (Law)	To support all development stakeholders in achieving the national objectives	- Outline of the long-term (20-year) national development visions, missions, objectives, priorities, and strategies	Bappenas-RI
			To ensure integration synchronization and synergy across jurisdiction, time and space and government functions	- Mission-7 of national development: To realize Indonesia as an archipelagic state that is self-reliance, advanced, strong based on national interest (maritime oriented development)
RPJMN 2015-2019	2015 (2015-2019)	Legislated planning document (Presidential Decree)	To translate the vision, missions, and program of elected President (2014)	- Outline of the medium-term (5-year) national development visions, missions, objectives, priorities, and strategies	Bappenas-RI
			To guide government institutions and local governments in developing their five-year strategic plans	- Development agenda: (1) Strengthening the identity as maritime nation; (2) Developing maritime economy
IOP 2017 & 1st Action Plan	2017 (2016-2019)	Legislated policy document (Presidential Decree)	IOP as the general guidelines on ocean policy and its implementation through programs and activities across government institutions. Also, IOP is adopted to accelerate the implementation of GMF.	- Defining GMF Vision and missions	CMMAI-RI
				- 7 pillars of IOP, 76 main policies, and 6 principles including blue economy and sustainable development
				- Funding, regulatory, and institutional frameworks
				- The plan of action
RPJMN 2020-2024	2020 (2020-2024)	Legislated planning document (Presidential Decree)	To translate the vision, missions, and program of elected President (2019)	Outline of the medium-term (5-year) national development visions, missions, objectives, priorities, and strategies	Bappenas-RI
			To guide government institutions and local governments in developing their five-year strategic plans
CMMAI-RI Five-Year Strategic Planning 2020-2024	2020 (2020-2024)	Planning document (Ministerial Regulation)	To guide all working units under CMMAI-RI in coordinating, synchronizing and controlling the policy implementation in maritime and investment based on national priority set out RPJMN for all relevant ministries (7) under CMMAI-RI coordination function	Outline of the CMMAI-RI vision, missions, objectives, priorities, and strategies for 5-year development plan	CMMAI-RI
IOP 2021-2025, 2nd Action Plan	2022 (2021-2025)	Legislated policy document (Presidential Decree)	To synergize and synchronize all ocean development programs to be more focused and targeted with measurable outcomes	- An update to IOP 2017 with new action plan for 2021-2025	CMMAI-RI
				- List of programs and activities
				- IOP KPI (Key Performance Indicators)
The Republic of Indonesia SDGs Government Securities Framework	2021	Financing policy framework	To issue Green and Blue Bonds and Sukuk (“Green Securities”), and Social and Sustainability Bonds and Sukuk (“SDGs Securities”), collectively referred as “Green and SDGs Securities”; To fund projects that will deliver environmental and social benefits that support the nation to achieve its 2030 development agenda	- Eligible SDGs Expenditures with Green and Blue focus	Bappenas-RI and Ministry of Finance (MoF-RI)
				- Eligible SDGs Expenditures with Social focus
				- Eligible Blue Projects
Blue Economy Development Framework for Indonesia’s Economic Transformation	2021	Policy framework	This document provides a vision and strategy for developing Indonesia's ocean and marine-based sectors (policy framework for sustainability of Indonesia's marine-based sectors)	- The scope of Indonesia's blue economy	Bappenas-RI & OECD
				- An economic analysis of Indonesia's blue economy prospects
				- A path forward for the blue economy framework
Indonesia Blue Finance Policy Note	2022	Policy framework	To provide the necessary information to coordinate key actors, build consensus, and identify and prioritize specific actions that will alleviate constraints to blue finance in Indonesia (with an emphasis on sustainable fisheries and marine conservation)	- The opportunity and challenges of Indonesia’s oceans and the natural blue economy	Bappenas-RI, ICCTF & World Bank (PROBLUE)
				- The current state of blue finance in Indonesia
				- Sources of finance
				- Priority Sectors to Target
				- Potential Blue Finance Instruments
Blue Finance Strategic Document	2022	Policy framework	To unravel the economic potential of marine-based economic activities and explore the capital market possibilities for investment in the blue economy	- Eligibility criteria for selecting a “Blue Project”	CMMAI-RI & UNDP
				- Blue financial instruments that are relevant for public and private investment
				- Blue economy sector potential in Indonesia to be financed
				- Potential financing schemes for blue economy sector potential in Indonesia
Indonesia Blue Economy Roadmap (1st & 2nd Ed)	2023	Policy framework	The roadmap sets out a pathway towards a diversified and sustainable maritime economy for Indonesia, based on ensuring the health and resilience of ocean ecosystems and securing benefits for current and future generations; and it provides the guidance on how the blue economy can increase productivity and contribute to economic transformation towards Indonesia Vision 2045	- Defining the blue economy and describing the current conditions in Indonesia (SWOT)	Bappenas-RI & Partners (UNRC, UNEP, ILO, UNDP, ARISE+ Indonesia, SwAM, EcoNusa Foundation)
				- The vision, mission, outcomes and indicators, and priority sectors for the Blue Economy in Indonesia
				- Strategic Action Plan and supporting mechanism
				- IBEI (Indonesia Blue Economy Index)

## Sheet: Table-2 BE sectors
Table 2. Blue economy sectors by different actors
Institutions/Actors	Blue Economy Clusters/Sectors
Government of Indonesia (2014)	Article 14, Law No. 32/2014: 2 clusters (8 sectors)
	The utilization of marine resources may cover the following sectors (4):
	Fisheries, energy and mineral resources, coastal and small islands resources, non-conventional resources, or natural resources that have not been used optimally.
	The exploitation of marine resources may consist of the following sectors (4):
	Marine industries, marine tourism, sea transportation, and sea building.
CMMAI-RI & BPS (2017)	Indonesia’s Maritime Gross Domestic Product 2010-2016: 9 clusters/sectors
	Fisheries; Energy and mineral resources; Biotechnology industry; Maritime industry; Maritime services; Marine tourism; Sea transportation; Offshore infrastructure; and Defense, Security, Law Enforcement and Safety at Sea.
Bappenas-RI-OECD (2021)	Blue Economy Development Framework: 2 clusters (19 sectors)
	Established sectors (9): Capture fisheries and seafood processing; Shipping and ports; Shipbuilding and repair; Offshore oil and gas (shallow water); Marine manufacturing and construction; Maritime and coastal tourism; Marine business services; Marine research and development and education; and Dredging.
	Emerging sectors (8): Marine aquaculture; Deepwater and ultra-deep-water oil and gas; Offshore wind energy; Ocean renewable energy; Marine and seabed mining; Maritime safety and surveillance; Marine biotechnology; and High-tech products and services.
CMMAI-RI & UNDP (2022) (Adaptation from Article 14, Law No. 32/2014)	Blue Financing Strategic Document: 2 clusters (8 sectors)
	The utilization of marine resources (4 sectors):
	Sustainable fishery; marine and coastal protection and restoration of its biodiversity and ecosystem; renewable marine energy; disaster management and risk reduction.
	The exploitation of marine resources (4 sectors):
	Waste management; marine technology (excluding biotechnology); marine biotechnology; ecotourism.
Bappenas-RI (2023)	Indonesia Blue Economy Roadmap: 2 clusters (8 sectors)
	Established sectors (4): (1) marine capture fisheries and aquaculture; (2) marine-based industry (including marine-based food processing industry, shipbuilding industry, and salt and chemical industry); (3) maritime trade, transportation, and logistics; and (4) tourism.
	Emerging sectors (4): (1) renewable energy; (2) biotechnology and bioeconomy; (3) research and education; and (4) marine conservation and sustainable management of ecosystem services.
	Note: Oil and gas sector is not considered in the Indonesia Blue Economy Roadmap as it is seen as non-renewable sector.
CMMAI-RI & BPS (2023)	Report on the Calculation of Indonesia's Maritime Gross Domestic Product 2017-2021: 12 clusters/sectors
	Fisheries and aquaculture; Maritime energy resources; Mining and marine extraction; Shipbuilding and repair services; Maritime renewable energy; Maritime construction; Maritime transportation and supporting activities; Marine tourism; Maritime services; Maritime processing industries; Other maritime industries; and Maritime Trade.
Keliat et al. (2022)	Blue Economic Prospects for the Economic Recovery of Indonesia: 6 clusters (18 sectors)
	(1) Marine Living Resources (4 sectors): Capture Fisheries; Mariculture; Marine Biotechnology; Marine Based Food.
	(2) Marine Non-Living Resources (1 sector): Renewable Energy.
	(3) Non-Extractive Use of Marine Systems (2 sectors): Coastal Tourism; Recreational Tourism.
	(4) Sustainable Marine Trade and Commerce (3 sectors): Shipbuilding; Port-Shipping; Logistic.
	(5) Marine Conservations (5 sectors): Research, Education, and Innovations; Managing Coastal Area; Managing Small Islands; Managing Outer Islands; Blue Carbon Trade.
	(6) Emerging Future Sector (3 sectors): Water Desalination; Marine-Based Chemical, Salt.

## Sheet: Table-3 Acronym & Abbre
Table 3. List of acronyms and abbreviations
ADB	Asian Development Bank
AIS Forum	Archipelagic and Island States Forum
ANCORS	The Australian National Centre for Ocean Resources and Security
ASEAN	Association of Southeast Asian Nations
Bakamla-RI	Maritime Security Agency, Republic of Indonesia (Badan Keamanan Laut, Republik Indonesia)
Bappenas-RI	Ministry of National Development Planning/National Development Planning Agency (Kementerian Perencanaan Pembangunan Nasional/Badan Perencanaan Pembangunan Nasional, Republik Indonesia)
BPS	Statistics Indonesia (Biro Pusat Statistik)
CMMA-RI	Coordinating Ministry for Maritime Affairs, Republic of Indonesia (Kementerian Koordinator Bidang Maritim/Kemaritiman, Republik Indonesia) (2014-2019)
CMMAI-RI	Coordinating Ministry for Maritime Affairs and Investment, Republic of Indonesia (Kementerian Koordinator Bidang Kemaritiman dan Investasi, Republik Indonesia) (2019-current)
CRD (PBI)	Climate Resilience Development (Pembangunan Berketahanan Iklim)
CTI	Coral Triangle Initiative
DEKIN	Indonesia Ocean Council (Dewan Kelautan Indonesia)
DG-SANTE	Directorate-General for Health and Food Safety of the European Commission
DKN	National Ocean Council (Dewan Kelautan Nasional)
DMI	Indonesia Maritime Council (Dewan Maritim Indonesia)
DPR-RI	House of Representative, Republic of Indonesia (Dewan Perwakilan Rakyat, Republik Indonesia)
DPSP	Super-Priority Tourism Destination (Daerah Pariwisata Super Prioritas)
GDP	Gross Domestic Product
GMF	Global Maritime Fulcrum
GNI	Gross National Income
HDI	Human Development Index
IBEI	Indonesia Blue Economy Index
ICCTF	Indonesia Climate Change Trust Fund
ICG	Indonesian Coast Guard
ICMA	International Capital Market Association
IICB-RI	Ministry of Investment/Indonesian Investment Coordinating Board, Republic of Indonesia (Kementerian Investasi / Badan Koordinasi Penanaman Modal / BKPM)
ILO	International Labour Organization
IOP	Indonesian Ocean Policy
IORA	Indian Ocean Rim Association
IPBC	International Partnership for Blue Carbon
JPY	Japanese Yen
Kominfo-RI	Ministry of Communication and Informatics, Republic of Indonesia (Kementerian Komunikasi dan Informatika, Republik Indonesia)
KADIN Indonesia	Indonesian Chamber of Commerce and Industry (Kamar Dagang dan Industri/KADIN Indonesia)
KPIs	Key Performance Indicators
KPLP	Sea and Coast Guard Unit (Kesatuan Penjaga Laut dan Pantai)
KSP	The Executive Office of the President (Kantor Staf Presiden)
LIPI	Indonesian Institute of Science (Lembaga Ilmu Pengetahuan Indonesia)
MEMR-RI	Ministry of Energy and Mineral Resources, Republic of Indonesia (Kementerian Energi dan Sumber Daya Mineral, Republik Indonesia/ESDM)
MEMA	Marine Estate Management Authority
MMAF-RI	Ministry of Marine Affairs and Fisheries, Republic of Indonesia (Kementerian Kelautan dan Perikanan, Republik Indonesia/KKP)
MOEF-RI	Ministry of Environment and Forestry, Republic of Indonesia (Kementerian Lingkungan Hidup dan Kehutanan, Republik Indonesia/KLHK)
MOF-RI	Ministry of Finance, Republic of Indonesia (MOF-RI) (Kementerian Keuangan, Republik Indonesia)
MOFA-RI	Ministry of Foreign Affairs, Republic of Indonesia (MOFA-RI) (Kementerian Luar Negeri, Republik Indonesia)
MOT-RI	Ministry of Transportation, Republic of Indonesia (Kementerian Perhubungan, Republik Indonesia)
MPAs	Marine Protected Areas
MPR-RI	People's Consultative Assembly, Republic of Indonesia (Majelis Permusyawaratan Rakyat, Republik Indonesia)
MPWH-RI	Ministry of Public Works and Housing, Republic of Indonesia (Kementerian Pekerjaan Umum dan Perumahan Rakyat, Republik Indonesia/PUPR)
MTCE-RI	Ministry of Tourism and Creative Economy, Republic of Indonesia (Kementerian Pariwisata dan Ekonomi Kreatif, Republik Indonesia)
NBAAP	National Blue Agenda Actions Partnership
NKRI	Unitary State of the Republic of Indonesia (Negara Kesatuan Republik Indonesia)
NMTCN	Nusantao Maritime Trading and Communication Network
NPAP	National Plastic Action Partnership
NSW	New South Wales
OECD	Organisation for Economic Co-operation and Development
OHI	Ocean Health Index
PANRB-RI	Ministry of State Apparatus Empowerment and Bureaucratic Reform (Kementerian Pendayagunaan Aparatur Negara dan Reformasi Birokrasi, Republik Indonesia)
PEMSEA	Partnerships in Environmental Management for the Seas of East Asia
RKP	Annual Development Plan (Rencana Kerja Pemerintah/RKP)
RPJMN	Medium-Term National Development Plan (Rencana Pembangunan Jangka Menengah Nasional)
RPJPN	Long-Term National Development Plan (Rencana Pembangunan Jangka Panjang Nasional)
SDGs	Sustainable Development Goals
SwAM	Swedish Agency for Marine and Water Management
SLR	Sea Level Rise
TARA	Threat and Risk Assessment
TKN PSL	National Coordination Team for Marine Waste Management (Tim Koordinasi Nasional Penanganan Sampah Laut)
UNCLOS	United Nations Convention on the Law of the Sea
UNDP	United Nations Development Programme
UNEP	United Nations Environment Programme
UNRC	United Nations Resident Coordinator
USD	United States Dollar
WCED	World Commission on Environment and Development
WMO	World Meteorological Organization
WMU	World Maritime University

## Sheet: Table-4 Refs list
Table 4. References List
No	Reference Type	Author(s)	Year	Title
1	Book	Leonardo A. A. Teguh Sambodo;Deasy Damayanti Putri Pane;Lelly Hasni Pertamawati;Siti Maftukhah;Irfan Thofiq Firdaus;Thaliya Wikapuspita;Samuel Kharis Harianto;Safira Mayasti Nurrahmani;Triana Apita Nugrahaeni;M. Thufail Mukhairiq;M. Ariq Rifqi Alfarisy;Raj	2023	Indonesia Blue Economy Roadmap
2	Book	KADIN Indonesia	2023	Indonesia Emas 2045 Roadmap: Building Indonesia’s tomorrow now
3	Book	Anastasia Rita Tisiana Dwi Kuswardani;Muh. Fidaus Agung Kunto Kurniawan;Zaki Mubarok;Ajar Buditama;Haryo Topo Yuwono	2023	Peta Jalan Ekonomi Biru: Menuju Indonesia Emas 2045
4	Book	CMMAI-RI	2023	Pokok-Pokok Pikiran untuk Pembangunan Kemaritiman - Maritim 2045: Konsepsi Pembangunan Nasional Menuju Indonesia Pusat Peradaban Maritim Dunia
5	Book	Marihot Nasution;Kiki Zakiah;Rastri Paramita;Ratna Christianingrum;Ervita Luluk Zahara;Rosalina Tineke Kusumawardhani;Damia Liana;Hikmatul Fitri;Ollani Vabiola Bangun;Mujiburrahman	2022	Anggaran Hijau Indonesia Dalam Menghadapi Perubahan Iklim
6	Book	Makmur Keliat;Denny Nugroho Sugianto;Yonvitner;Riza Damanik;Reyhan Noor;Indah Lestari;Fariz Raffandi Marzuki;Rionanda Dhamma Putra;Dessy Aryanti;Elinna Putri Handayani;Dina Lesdantina;Luky Adrianto;Umi Muawanah;Fony Farizal	2022	Prospek Ekonomi Biru bagi Pemulihan Ekonomi Indonesia
7	Book	Deasy Damayanti Putri Pane;Piera Tortora;Istasius Angger Anindito;Setyawati;Lelly Hasni Pertamawati;Thaliya Wikapuspita;Adhitya Kusuma Ardana;Raja Aldo Manullang;Dwi Mulyaningsih;Rega Renata Abdullah;Afaf Setia Ashari;Rizal Putra Munthe;Samuel Kharis Haria	2021	Blue Economy Development Framework for Indonesia’s Economic Transformation
8	Book	BPS	2021	Potret Sensus Penduduk 2020 Menuju Satu Data Kependudukan Indonesia
9	Book	Frida Sidik;Novia Arinda Pradisty;Nuryani Widagti	2021	Restored mangrove forests in Perancak Estuary, Bali: 17 years of mangrove restoration in abandoned aquaculture ponds
10	Book	Wisnu Handoko;Willem Thobias Fofid;Hasan Sadili;Florentina Kristini	2020	Tol Laut: Konektivitas Visi Poros Maritim Indonesia
11	Book	Harjo Susmoro;Haris Djoko Nugroho;Yanuar Handwiono	2019	Bunga Rampai Penetapan Batas Maritim RI – Negara Tetangga: Peran Pushidrosal dalam Mendukung Diplomasi Maritim Indonesia
12	Book	Bellwood, Peter	2017	First Islanders: Prehistory and Human Migration in Island Southeast Asia
13	Book	Sukoyono, Suseno;Suhana	2015	Membangun laut, membangun manusia
14	Book Section	Heryandi	2019	Implementasi Kebijakan Kelautan Indonesia di Daerah Otonom
15	Book Section	Achmad Poernomo;Anastasia Rita Tisiana Dwi Kuswardani	2019	Ocean policy perspectives: The case of Indonesia
16	Conference Proceedings	Haryono, Cosmas Gatot	2024	Framing news of the Indonesian government’s determination to encourage green economy, blue green economy and green technology
17	Conference Proceedings	Andhita Yukihana, Rahmayanti;Dewi Kartika, Sari	2023	Blue Accounting to Enhance the Quality of Sustainability Report
18	Conference Proceedings	Rahman, A.;Hermanto, A.;	2023	Optimalization the Blue Economy Policy of the Tourism Sector using E-Government in the Coastal Area of Ambon Island
19	Conference Proceedings	Delimayanti, M. K.;Lestari, U. P.;Prastiwinarti, W.;Ryanari, R. A.;Prasetyo, R. A.;Ismail, M. K.	2022	Development of Integrated Web Application for Fishery Trading in Indonesia
20	Conference Proceedings	Vindaniar Yuristamanda, Putri;Stephanie Nuriani, Janice;Tiara Ramdhan, Azzahra	2022	Seeking the Opportunities and Challenges of Blue Economy Sustainable Development: A Case Study of Sidoarjo, Indonesia
21	Conference Proceedings	Sudapet, N.;Sukoco, A.;Harmanto, D.;	2018	Integration model of maritime and tourism in the regional areas to enhancing economy in the East Indonesia
22	Conference Proceedings	Purwendah, Elly Kristiani;Triatmodjo, Marsudi;Sulistiawati, Linda Yanti	2018	The roles of the ministry of marine and fishery in marine environment protection from oil pollution by tankers in the sea in Indonesian Legal System
23	Conference Proceedings	Alamsjah, Mochammad Amin	2017	An overview of the seaweed cultivation in several countries: Technology and challenge
24	Conference Proceedings	Ginting, Bengkel	2017	Poverty of Traditional Fisherman Percut Village Percut Sei Tuan District Deli Serdang District
25	Conference Proceedings	Ying, Y.;Mursitama, T. N.;Oktriono, K.;Abbas, B. S.;	2017	The preliminaries for human resources' capabilities in natuna Islands: Global maritime axis conceptual framework
26	Government Document	CMMAI-RI	2023	Coordinating Minister Regulation Number 1 of 2023 on the Guidelines for the Implementation of Monitoring, Evaluation, Reporting, and Adjustment of the Action Plan for Indonesian Ocean Policy 2021-2025
27	Government Document	Government of Indonesia	2022	Government Regulation Number 13 of 2022 on the Implementation of Security, Safety, and Law Enforcement in Indonesian Waters and Jurisdiction
28	Government Document	MMAF-RI	2022	Keputusan Menteri Kelautan dan Perikanan Nomor 19 Tahun 2022 tentang Estimasi Potensi Sumber Daya Ikan, Jumlah Tangkapan Ikan yang Diperbolehkan, dan Tingkat Pemanfaatan Sumber Daya Ikan di Wilayah Pengelolaan Perikanan Negara Republik Indonesia
29	Government Document	Government of Indonesia	2022	Presidential Decree of the Republic of Indonesia Number 34 of 2022 on Action Plan for Indonesian Ocean Policy (IOP) 2021-2025
30	Government Document	Government of Indonesia	2021	Republic of Indonesia SDGs Government Securities Framework
31	Government Document	CMMAI-RI	2020	Coordinating Minister Regulation Number 6 of 2020 on CMMAI-RI Medium Term Strategic Plan 2020-2024
32	Government Document	Government of Indonesia	2020	Presidential Decree of the Republic of Indonesia Number 18 of 2020 on the National Medium-Term Planning for 2020-2024
33	Government Document	Government of Indonesia	2019	Presidential Decree of the Republic of Indonesia Number 92 of 2019 on Coordinating Ministry for Maritime and Investment Affairs (CMMAI)
34	Government Document	Government of Indonesia	2017	Government Regulation Number 17 of 2017 on the Synchronization of the National Development Planning and Budgeting Processes
35	Government Document	Government of Indonesia	2017	Presidential Decree of the Republic of Indonesia Number 16 of 2017 on Indonesian Ocean Policy (IOP)
36	Government Document	Government of Indonesia	2017	Presidential Decree of the Republic of Indonesia Number 22 of 2017 on the National Energy General Plan
37	Government Document	Government of Indonesia	2016	Presidential Decree of the Republic of Indonesia Number 47 of 2016 on the Designation of the Patimban Port in Subang Regency, West Java Province, as a National Strategic Project
38	Government Document	Government of Indonesia	2015	Presidential Decree of the Republic of Indonesia Number 10 of 2015 on Coordinating Ministry for Maritime Affairs (CMMA)
39	Government Document	Government of Indonesia	2015	Presidential Decree of the Republic of Indonesia Number 2 of 2015 on National Medium-Term Development Plan 2015-2019
40	Government Document	Government of Indonesia	2014	Law Number 32 of 2014 on the Ocean Affairs
41	Government Document	Government of Indonesia	2014	Presidential Decision of the Republic of Indonesia Number 121 of 2014 on the Formation of Ministries and the Appointment of Ministers for Kabinet Kerja 2014-2019
42	Government Document	Bappenas-RI	2014	Rencana Aksi Nasional Adaptasi Perubahan Iklim (RAN-API) / National Action Plan for Climate Change Adaptation
43	Government Document	Government of Indonesia	2011	Law Number 12 of 2011 on the Formulation of Legal Regulations
44	Government Document	Government of Indonesia	2011	Presidential Decree of the Republic of Indonesia Number 61 of 2011 on the National Action Plan for the Reduction of Greenhouse Gas Emissions
45	Government Document	Government of Indonesia	2007	Law Number 17 of 2007 on the National Long-Term Development Plan 2005-2025
46	Journal Article	Sarjana, Sri;Claudia, Sindy Allaam;Ramadhina, Assyifa Tasma;Suyanti, Lilis	2024	A sustainable blue economy: Blockchain and internet of things integration in tourism villages
47	Journal Article	Aruri, Y.;Sunariya, M. I. T.;Mardiansyah, A.	2024	Analysis of recommendations for developing sustainable fishing areas based on geographic information systems: the integrated Center of Marine and Fisheries (SKPT) Mimika case study
48	Journal Article	Umbas, A. P.;Fauzi, A.;Purnomo, H.;Kolopaking, L. M.	2024	Analysis of value chains, roles and actor networks in organic tiger shrimp management in Sidoarjo District, East Java, Indonesia, based on the concept of blue economy
49	Journal Article	Yusuf, M.;Samsir, A.;Tiro, S.;Ilyas, M.;Riana, A. D.;Saru, A.;Ahmad, M.;Pratama, C. D.	2024	Blue economy policy model for encouraging regional growth in South Sulawesi
50	Journal Article	Oktaviani, Dewi;Sunardi,;Sumiarsa, Dadan	2024	Carbon stock of mangrove ecosystem and role blue economy in Pangandaran West Java
51	Journal Article	Susandi, Armi;Wijaya, Aristiyo R.;Ihsan, Mustafid	2024	Challenges and Opportunities of Implementing Marine Ecological Carrying Capacity Index in the Blue Economy: A Case Study of Coastal Communities in East Nusa Tenggara Province
52	Journal Article	Hendarman, Achmad Fajar;Pritasari, Adita;Desiana, Nia;Astiri, Selina;Dwifani, Defrina;Sonia, Veren;Kumarasakti, Rahadian Pramudito;Siahaan, Yessi A.	2024	Current Research and Future Perspectives: A Literature Review on the Blue Economy of Indonesia
53	Journal Article	Rianawati, Andri;Darmasetiawan, Noviaty Kresna;Hadi, Faizal Susilo;Oktavianus, Joshua;Utama, Carissa Avelinda	2024	Enhancement of Indonesia’s blue economy sector through innovation and competitive advantage based on Resource-Based View theory
54	Journal Article	Syarif, E.;Saputro, A.	2024	Environmental Friendship Levels of Bajo Fishers to Build a Blue Economy in Achieving the 2030 SDGs
55	Journal Article	Ahmadi, Nurdin;Suwito, Sri Rahardjo;Christian, Yopie;Hasriningtyas, Sinta	2024	Global and Indonesia Blue Economy Knowledge Map
56	Journal Article	Wiryawan, R. D.;Murakabhi, E. C.;Djarwono, L. F.	2024	Less optimized blue economy sectors in Joko Widodo era
57	Journal Article	Sujiwo, Aryo Sahid;Nurlaili, Nurlaili	2024	Pengembangan Tata Kelola Ekonomi Biru Untuk Memperkuat Blue Economy Development Index di Indonesia
58	Journal Article	Jinca, M. Y.;Ali, M. S. S.;Asdar, M.	2024	Strategies for Enhancing Inter-Island Transportation Performance in Makassar, Indonesia: An Integrated Planning Approach
59	Journal Article	Muliani Dwi Ujianti, Rizky;Novita, Mega;Burhanuddin, Aan	2024	Strengthening the Blue Economy through Marine, Coastal Resources and the Social Environment
60	Journal Article	Layman, Chrisanty V.;Handoko, Liza;Sihombing, Sabrina O.	2023	An Ocean of Opportunity: The Digitalization of Small and Medium-sized Enterprises in Bitung, Indonesia
61	Journal Article	Sulistijowati, R.;Yuliati, Lilis;Komariyah, Siti	2023	Analysis of investment and international trade on the Gross Domestic Product of the fisheries sector in Indonesia: evidence from the Panel Vector Autoregressive (P-VAR) Model
62	Journal Article	Sulistijowati, Rieny;Yuliati, Lilis;Komariyah, Siti;Musaiyaroh, Ati	2023	Analysis of Trade, Investment, and Global Value Chain on the Gross Domestic Product of Fisheries Sector in Indonesia
63	Journal Article	Quevedo, J. M. D.;Lukman, K. M.;Ulumuddin, Y. I.;Uchiyama, Y.;Kohsaka, R.	2023	Applying the DPSIR framework to qualitatively assess the globally important mangrove ecosystems of Indonesia: A review towards evidence-based policymaking approaches
64	Journal Article	Syamsuddin, M. L.;Faiz, H. U.;Ismail, M. R.;Harahap, S. A.;Yuniarti, M. S.;Ihsan, Y. N.;Syamsudin, F.;Sari, Q. W.;Aura, C. M.	2023	Aquaculture feasibility and suitability of the coastal areas of Karampuang Island, West Sulawesi, Indonesia
65	Journal Article	Pranita, Diaz;Sarjana, Sri;Musthofa, Budiman Mahmud;Kusumastuti, Hadining;Rasul, Mohamad Sattar	2023	Blockchain Technology to Enhance Integrated Blue Economy: A Case Study in Strengthening Sustainable Tourism on Smart Islands
66	Journal Article	Pattinaja, E. M.;Abrahamsz, J.;Loppies, L. R.	2023	Blue economy accounting model for tuna fisher groups in Maluku Province, Indonesia
67	Journal Article	Komalasari Dewi, Yetty;Purnamasari, Dhini	2023	Costs of maritime security inspection to merchant ship operations - the Indonesian shipowners' perspective
68	Journal Article	Siswanto, N.;Rosdaniah, S.	2023	Driving Blue Economy for Sustainable Development: A case of stakeholder collaboration platform development
69	Journal Article	Kumala, M. T.;Vinata, R. T.;Suharti, T.;Setyowati, P. J.	2023	Fishermen Human Rights Protection and Sustainable Development in the Indonesian Marine Sector
70	Journal Article	Pratama, R. A.;Akbar, D.;Putra, A.;Triyana, N.;Sianturi, R. L.;Saswi, V. D.;Prabowo, L.	2023	GVC as a Tool for Sustainable Blue Economy of Coastal Community in Bintan Island
71	Journal Article	Aflah, A.;Purba, H.;Suhaidi, S.;Siregar, M.;	2023	Impact of the enforcement of ASEAN Economic Community on policy and strategy of sea transportation development in Indonesia
72	Journal Article	Wahid, Ahmad;Jinca, M. Yamin;Rachman, Taufiqur;Malisan, Johny	2023	Implementation of Safety Management System on Traditional Shipping for Strengthening the Blue Economy
73	Journal Article	Kamal Putra, Muhammad Na'afil;Asri, Muhammad Farhan	2023	Juridical Review of Blue Economy in Indonesia
74	Journal Article	Indra Jaya;	2023	Literasi Maritim: Landasan Pembangunan Negara Kepulauan
75	Journal Article	Supriyadi, Supriyadi;Afrisal, Muh;Situmorang, Raymundus Putra;Mau, Kristera Tesa Bere;Widodo, Ari;Isdianto, Andik;Puspitasari, Intan Dwi	2023	Local and Migrant Fishermen Marine Cultures in the Atapupu Coastal Area in Supporting the Blue Economy in Maritime Security
76	Journal Article	Putri, A.;Kamila, S. F.	2023	Overtaking Marine Pollution Issues for Sustainable Eco-Tourism in Mapur Island
77	Journal Article	Mahadiansar, Mahadiansar;Alfiandri, Alfiandri;Marliani, Marliani	2023	PESTEL Analysis of Blue Economy Development Policy in Indonesia
78	Journal Article	Kobayashi, M.	2023	Promoting sustainable fisheries and aquaculture – Enabling policies, innovation and challenges for achieving sustainable blue economies in Ambon, Maluku Province, Indonesia
79	Journal Article	Rudi, Subiyakto	2023	Public Policy in the Concept of Blue Economy for Anticipating Disasters in Indonesia
80	Journal Article	Hana Catur, Wahyuni;Puspita, Handayani;Rima, Azzahra	2023	Strategi pengembangan produk perikanan berdasarkan integrasi konsep blue economy, keamanan pangan dan halal
81	Journal Article	Febriana, Elfrinda Eka;Paksi, Arie Kusuma	2023	Strategi World Wide Fund for Nature (WWF) dalam Mendukung Program Blue Economy di Indonesia
82	Journal Article	Rahmiyati, Nekky;Rachmawati, Titiek	2023	Strategy model of coastal women's economic empowerment (fisherman's wife) based on blue economy and local potential in kenjeran beach tourism location city of Surabaya
83	Journal Article	Oktaviani, Jusmalia;Muhamad Iqbal, Firdaus	2023	The Interplay of Interest between Indonesia and Sweden in Blue Economy Cooperation
84	Journal Article	Nasution, Anta Maulana;Wicaksono, Viga Ananda	2023	The Political Economy of Fisheries Development During Joko Widodo’s Regime
85	Journal Article	Wardhani, Baiq;Santoso, Yohanes W.;Mubah, A. Safril;Pratamasari, Annisa;Dugis, Vinsensio;Latifah,;Yu, Ya Wen	2023	The Trap of the Blue Economy: Evidence from Lombok Island, Indonesia
86	Journal Article	Asikin, Nurul;Suwono, Hadi;Bambang Sumitro, Sutiman;Dharmawan, Agus;Qadri Tanjung, Annisa	2023	Trend ocean literacy research in Indonesia: A bibliometric analysis
87	Journal Article	Widiyanto, Wahyu;Purnomo, Sanidhya N.;Shalsabila, Shelbia A.;Gunawan, Sri	2023	Tsunami debris analysis to support blue economy development in Tasikmalaya, West Java
88	Journal Article	Faizal, Ibnu;Anna, Zuzy;Utami, Sanny T.;Mulyani, Putri G.;Purba, Noir P.	2022	Baseline data of marine debris in the Indonesia beaches
89	Journal Article	Razak, T. B.;Boström-Einarsson, L.;Alisa, C. A. G.;Vida, R. T.;Lamont, T. A. C.	2022	Coral reef restoration in Indonesia: A review of policies and projects
90	Journal Article	Setiyowati, Harlis;Nugroho, Mulyanto;Halik, Abdul	2022	Developing a Blue Economy in Depok West Java, Indonesia: Opportunities and Challenges of Neon Tetra Fish Cultivation
91	Journal Article	Rasyid, Syamsul Bahri Abd;Purnomo, Eko Priyo;Salsabila, Lubna;Fathani, Aqil Teguh	2022	Discourse Analysis of Online News on Green Economy and Blue Economy for Sustainable Development: The Case in Indonesia
92	Journal Article	Purwendah, Elly Kristiani;Djatmiko, Agoes;Erowati, Eti Mul;Triana, Ikama Dewi Setia;Pudyastiwi, Elisabeth	2022	Ecological and Social Justice as Basis on Marine Environment Protection and Preservation in The System of Indonesian Law
93	Journal Article	Sihombing, Sabrina O.;Layman, Chrisanty;Handoko, Liza	2022	Exploring Factors Affecting the Digitization of Blue Economy Micro- Small and Medium Enterprises (MSMEs): Indonesian Context
94	Journal Article	Andréfouët, S.;Paul, M.;Farhan, A. R.;	2022	Indonesia's 13558 islands: A new census from space and a first step towards a One Map for Small Islands Policy
95	Journal Article	Booth, Hollie;Mourato, Susana;Milner-Gulland, E. J.	2022	Investigating acceptance of marine tourism levies, to cover the opportunity costs of conservation for coastal communities
96	Journal Article	Gani, Irwan;Auliansyah, Auliansyah;Gaffar, Emmilya Umma Aziza;Muliati, Muliati;Aprianti, Yesi;Rachmadi, Revy Fadly Robby;Agustina, Nadia Indri	2022	Makassar Strait Area Development in Indonesia Based on the Marine Economy Sector
97	Journal Article	Raharja, Dinna Prapto;Karim, Moch Faisal	2022	Re-territorialization and the governance of ocean frontiers in Indonesia
98	Journal Article	Hutajulu, H.;Imran, Z.;Budiharsono, S.;Kusumastanto, T.	2021	Alternative policies based on blue economy for the skipjack (Katsuwonus pelamis) fishery management of Jayapura City, Papua, Indonesia
99	Journal Article	Kabil, M.;Priatmoko, S.;Magda, R.;David, L. D.	2021	Blue Economy and Coastal Tourism: A Comprehensive Visualization Bibliometric Analysis
100	Journal Article	Singgih Tri Sulistiyono;Haryono Rinardi;Yety Rochwulaningsih	2021	Capitalism Expansion and Local Adaptation: Maritime Trade Network on the North Coast of Java During the Early Modern Period
101	Journal Article	Pradana, Muhammad Andhika	2021	Dampak Blue Economy terhadap Ekosistem di Asia Pasifik
102	Journal Article	Maskun,;Napang, Marthen;Naswar,;Assidiq, Hasbi;Nurhaliza Bachril, Siti	2021	Legal politics of fulfillment of sustainable fisheries resources after the enactment of the Omnibus Law 2020
103	Journal Article	Adiprayoga, S. N.;Samiaji, Joko	2021	Opportunities and Strategies for the Blue Economy Through the Empowerment of Sumatera Coastal Communities in Supporting the Realization of the National Food Security
104	Journal Article	Wanta, Derry;Gunawan, Juniati	2021	Sustainability Blue Disclosures: Index Development and Preliminary Implementation
105	Journal Article	Choirunnisa, A.;Atmanti, H. D.;	2021	The impact of increasing fuel prices on the sustainable marine economy in Central Java, Indonesia
106	Journal Article	Badriyah, S. M.;Mahmudah, S.;Soemarmi, A.;Suharto, R.;Allam, M. H. F.;Larasati, A.	2021	The responsibility of private pawnshops in facilitating ecologically-friendly marine economies
107	Journal Article	Praptiwi, Radisti A.;Maharja, Carya;Fortnam, Matt;Chaigneau, Tomas;Evans, Louisa;Garniati, Leuserina;Sugardjito, Jito	2021	Tourism-based alternative livelihoods for small island communities transitioning towards a blue economy
108	Journal Article	Susandi, A.;Wijaya, A.;Kuntoro, W. S.;Faisal, I.;Pratama, A. Y.;Nurdin, I.;Kertabudi, F. G.	2021	Towards Development of a Web-Based System for Analyzing Marine Ecological Carrying Capacity (MECC) for Managing Marine Resources in The Outer Island of Indonesia (Case Study: Nunukan Regency)
109	Journal Article	Ghazali, Rusman	2020	Acceleration of Maritime Development in Indonesia
110	Journal Article	Sari, D. A. A.;Muslimah, S.	2020	Blue economy policy for sustainable fisheries in Indonesia
111	Journal Article	Suyadi	2020	Characteristics of mangrove ecosystems in Weda Bay: Environment, Vegetation, and Aboveground Carbon Stocks
112	Journal Article	Sumarmi,;Kurniawati, Elya;Aliman, Muhammad	2020	Community based tourism (cbt) to establish blue economy and improve public welfare for fishing tourism development in klatak beach, tulungagung, indonesia
113	Journal Article	Sapanli, Kastana;Kusumastanto, Tridoyo;Budiharsono, Sugeng;Sadelie, Agus	2020	Dinamika dan kebijakan pengembangan ekonomi kelautan Indonesia
114	Journal Article	Phelan, Anna;Ruhanen, Lisa;Mair, Judith	2020	Ecosystem services approach for community-based ecotourism: towards an equitable and sustainable blue economy
115	Journal Article	Choandi, Mieke;Jessica Berlian, Lourensya	2020	Floating Market In Muara Angke
116	Journal Article	Ade Maman Suherman;Aryuni Yuliantiningsih;Noer Indriati;Wismaningsih;Hazmi Rusli	2020	Indonesian ocean policy: Paradigm shift in strengthening ocean governance
117	Journal Article	Agus Suherman;Mas Achmad Santosa;Yudi N Ihsan;Dian Wijayanto;Stephanie Juwana	2020	The eradication of IUU fishing in indonesia for fisheries resources sustainability by the task force 115
118	Journal Article	Nurhidayah, Laely;McIlgorm, Alistair	2019	Coastal adaptation laws and the social justice of policies to address sea level rise: An Indonesian insight
119	Journal Article	Atika Sari, Diah Apriani	2019	Integrasi Tata Kelola Kebijakan Pembangunan Kelautan Berkelanjutan
120	Journal Article	Susetyorini, Peni	2019	Kebijakan Kelautan Indonesia dalam perspektif UNCLOS 1982
121	Journal Article	Purba, Noir P.;Handyman, Dannisa I. W.;Pribadi, Tri D.;Syakti, Agung D.;Pranowo, Widodo S.;Harvey, Andrew;Ihsan, Yudi N.	2019	Marine debris in Indonesia: A review of research and status
122	Journal Article	Rochwulaningsih, Yety;Sulistiyono, Singgih Tri;Masruroh, Noor Naelil;Maulany, Nazala Noor	2019	Marine policy basis of Indonesia as a maritime state: The importance of integrated economy
123	Journal Article	Wiratma, Harits Dwi;Nurgiyanti, Tanti	2019	Pembangunan Pariwisata Kulon Progo Melalui Konsep Green Economy dan Blue Economy
124	Journal Article	Suyadi,;Satrioajie, W. N.;Syahailatua, A.;Arifin, Z.	2018	Banda deep-sea research: history, mission and strategic plan
125	Journal Article	Dina Sunyowati;Franky Butar Butar	2018	Dampak Penerapan UU Nomor 23 Tahun 2014 tentang Pemerintahan Daerah terhadap Pengelolaan Kelautan di Indonesia
126	Journal Article	Hadyu, Ikrami;Leonardo, Bernard	2018	Indonesia's Maritime Governance: Law, Institutions and Cooperation
127	Journal Article	Muda, I.;Rahmanta,;Marhayanie,;Putra, A. S.	2018	Institutional Fishermen Economic Development Models and Banking Support in the Development of the Innovation System of Fisheries and Marine Area in North Sumatera
128	Journal Article	Adi, Tukul Rameyo	2018	Maritime culture empowerment under Indonesian ocean policy
129	Journal Article	Sofiana, Nina;Yuliasri, Issy;Haryanto, Haryanto	2018	Promoting English Education along Indonesian Coastal Zone
130	Journal Article	Efriza	2018	Refleksi: Pembangunan Maritim sebagai Haluan Negara di Era Kepemimpinan Presiden Joko Widodo
131	Journal Article	Keoni Marzuki	2017	Indonesia’s National Sea Policy: Concretising the Global Maritime Fulcrum
132	Journal Article	Mawarsari, P. M.;Dewanti, A. N.;Nurrahman, F.	2017	Minapolitan region development analysis at Penajam Paser Utara using blue economy concept
133	Journal Article	Nur Said, Said	2016	Menggerakkan Ekonomi Maritim Syari’ah di Indonesia
134	Journal Article	Zebblon, Passion Ch;Undap, Suzanne L.;Lasut, Markus T.	2016	Public perception on the application of eco-fishing port in Ocean Fishing Port of Bitung, North Sulawesi
135	Journal Article	Suparmoko, Matius	2016	The Role of the Ocean Economy in the National Income Accounts of Indonesia
136	Journal Article	Ferrol-Schulte, D.;Goals, P.;Baitoningsih, W.;Adhuri, D. S.;Ferse, S. C. A.	2015	Coastal livelihood vulnerability to marine resource degradation: A review of the Indonesian national coastal and marine policy framework
137	Journal Article	Erlania, Erlania;Radiarta, I. Nyoman	2015	Pengembangan Budidaya Rumput Laut: Implikasi Penerapan Blue Economy di Teluk Sereweh, Nusa Tenggara Barat
138	Journal Article	Farhan, A. R.;Lim, S.;	2014	Assessment of ocean and coastal policy effectiveness in Seribu Islands, Indonesia
139	Journal Article	Campbell, S. J.;Kartawijaya, T.;Yulianto, I.;Prasetia, R.;Clifton, J.	2013	Co-management approaches and incentives improve management effectiveness in the Karimunjawa National Park, Indonesia
140	Journal Article	Saksono, Herie	2013	Ekonomi Biru: Solusi Pembangunan Daerah Berciri Kepulauan Studi Kasus Kabupaten Kepulauan Anambas
141	Newspaper Article	Indroyono Soesilo	2014	Blue economy for marine resource development
142	Online Multimedia	CMMAI-RI	2024	International Center for Tropical Seaweeds: Seminar on Acceleratin the Upstream-Downstream Integration of the Seaweed Industry & Launching of the International Tropical Seaweed Research Center
143	Online Multimedia	@america	2024	Navigating the Blue Economy: Promoting the Sustainable Indonesian Ocean Industry
144	Online Multimedia	CMMAI-RI	2023	[DAY 1] Indonesia Sustainability Forum 2023
145	Online Multimedia	CMMAI-RI	2023	[DAY 2] Indonesia Sustainability Forum 2023
146	Online Multimedia	CMMAI-RI	2023	[LIVE] Seminar Nasional Kemaritiman
147	Online Multimedia	CMMAI-RI	2023	[RE-LIVE] WORKSHOP Strategi Blue Carbon Indonesia
148	Online Multimedia	MMAF-RI	2023	[WORKSHOP] Strategi Blue Carbon Indonesia
149	Online Multimedia	MMAF-RI	2023	[WORKSHOP] Strategi Blue Carbon Indonesia (Strategi Blue Carbon Indonesia untuk Pencapaian Target Nationally Determined Contribution (NDC) dan Implementasi Nilai Ekonomi Karbon (NEK))
150	Online Multimedia	Bappenas-RI	2023	ASEAN Blue Economy Forum 2023
151	Online Multimedia	Bappenas-RI	2023	Blue Food Forum
152	Online Multimedia	Bappenas-RI	2023	Era Baru Biaya Logistik untuk Indonesia Emas 2045
153	Online Multimedia	Bappenas-RI	2023	Indonesia Development Forum 2023
154	Online Multimedia	Bappenas-RI	2023	Multi-Stakeholder Dialogue on the Development of the ASEAN Blue Economy Framework
155	Online Multimedia	CMMAI-RI	2023	Opening Ceremony Marine Spatial Planning and Expo Service 2023
156	Online Multimedia	MOEF-RI	2023	Penguatan Blue Carbon Ecosystem Governance di Indonesia
157	Online Multimedia	Indonesia Ocean Justice Initiative (IOJI)	2023	Penguatan Tata Kelola Kelautan Berkelanjutan dan Berkeadilan dalam Rencana Pembangunan Nasional (Hari-2)
158	Online Multimedia	Bappenas-RI	2023	Ruang Bincang #3: Reimagine Negara Maritim Indonesia dalam Perspektif Kesejarahan dan Budaya
159	Online Multimedia	Bappenas-RI	2023	Seminar Penguatan Tata Kelola Kelautan Berkelanjutan dan Berkeadilan dalam Rencana Pembangunan Nasional
160	Online Multimedia	Bappenas-RI	2023	Seminar Penjaringan Masukan Visi RPJPN 2025-2045 (Negara Maritim yang Berdaulat, Maju, dan Berkelanjutan)
161	Online Multimedia	Bappenas-RI	2023	Transformasi Ekonomi Menuju Indonesia Emas 2045
162	Online Multimedia	Bappenas-RI	2023	Working Level Meeting #ABEF2023: Enabling Environment for Blue Finance Initative Indonesia
163	Online Multimedia	Bappenas-RI	2023	Working Level Meeting #ABEF2023: Initiating Blue Economy Collaboration
164	Online Multimedia	MMAF-RI	2022	Blue Economy Conference and Trade Exhibition
165	Online Multimedia	UNDP Indonesia	2022	Blue Finance Accelerator Kick-Off and Consultation for the Blue Economy Development in Indonesia
166	Online Multimedia	MMAF-RI	2022	Ekonomi Biru di Mata Start Up
167	Online Multimedia	MMAF-RI	2022	Indonesia Vision 2045: Blue Economy for Indonesian Fisheries
168	Online Multimedia	CMMAI-RI	2022	Road to Ocean 20 Workshop: Effective Management to Conserve and Sustainably Use the Oceans
169	Online Multimedia	Bappenas-RI	2022	Seminar of the Development of Indonesia's Blue Economy Roadmap
170	Online Multimedia	Bappenas-RI	2022	Showcasing Session Blue Economy Initiatives
171	Online Multimedia	CMMAI-RI	2022	The Launch of the National Blue Agenda Actions Partnership
172	Online Multimedia	BPS Provinsi Bali	2022	Webinar Nasional Blue Economy For Sustainable Development
173	Online Multimedia	Bappenas-RI	2022	Webinar Sustainable Blue Finance
174	Online Multimedia	MOEF-RI	2022	Workshop Blue Carbon Dalam Pembangunan Blue Economy dan Pencapaian Target NDC
175	Online Multimedia	CMMAI-RI	2021	Forum Group Discussion Hari Maritim Nasional ke 57
176	Online Multimedia	CMMAI-RI	2021	Mau Dibawa Kemana Arah Haluan Maritim Nasional?
177	Online Multimedia	Indonesia Ocean Justice Initiative (IOJI)	2021	Seminar Menuju Sustainable Ocean Economy (Hari Kedua)
178	Online Multimedia	MMAF-RI (VICON KKP)	2021	Seminar Menuju Sustainable Ocean Economy di Indonesia
179	Online Multimedia	MMAF-RI (Ditjen Pengelolaan Kelautan dan Ruang Laut)	2020	BISIK-BISIK PRL #3 - Marine Protected Area Vision 2030
180	Online Multimedia	CMMAI-RI	2020	Blue Carbon for A Sustainable Blue Economy
181	Online Multimedia	MOT-RI (Kementerian Perhubungan RI)	2020	Peluncuran dan Bedah Buku “Tol Laut, Konektivitas Visi Poros Maritim Indonesia”
182	Online Multimedia	CMMAI-RI	2020	Peringatan Deklarasi Benua Maritim Indonesia
183	Online Multimedia	Foreign Policy Community of Indonesia (FPCI)	2020	Special Virtual Masterclass on Ocean Environment with H.E. Arif Havas Oegroseno
184	Online Multimedia	Indonesia Ocean Justice Initiative (IOJI)	2020	Transformasi Menuju Pembangunan Ekonomi Kelautan yang Berkelanjutan
185	Online Multimedia	Ditjen IKP Kominfo	2016	Sudut Istana Pro 3 RRI "Dua Tahun Pemerintahan Jokowi JK: Poros Maritim Dunia" (Eps.27)
186	Press Release	CMMAI-RI	2023	Oktober Mendatang, 51 Negara Akan Hadiri KTT AIS Forum di Bali
187	Press Release	MOF-RI	2023	Republic of Indonesia Successfully Issues JPY 104.8 billion 4-tranche Samurai Bond and Inaugural Blue Bonds Through Public Samurai Bond Shelf Program
188	Press Release	Government of Indonesia	2022	Indonesia - High-level Segment Statement COP 27
189	Press Release	Cabinet Secretary of the Government of Indonesia	2020	Transportation Minister: Patimban to be the Biggest Port
190	Report	ADB	2024	Proposed Programmatic Approach and PolicyBased Loan for Subprogram 1 Republic of Indonesia: Reducing Marine Debris Program
191	Report	BPS	2023	Indonesian Economic Report 2023
192	Report	CMMAI-RI, BPS	2023	Laporan Hasil Perhitungan Produk Domestik Bruto Maritim Indonesia 2017-2021
193	Conference Proceedings	Mahardianingtyas, Sofia;Safitra, Dhian Adhetiya;Agustio, Alfado;	2019	A blue economy for better economic development: A case study of East Nusa Tenggara, Indonesia
194	Journal Article	Apriliana, Tria;Fathonah, Andina Nur;Ali, Muhammad;	2024	Blue Economy dalam Upaya Pengentasan Kemiskinan Masyarakat Pesisir di Indonesia
195	Journal Article	Sudjudiman, Haikal Narendra;Subekti, Rahayu;	2024	Blue economy: Peluang mengatasi krisis ekologi dalam pembangunan sosial di Indonesia
196	Journal Article	Annisa, Arna Asna;Indriyani, Fany;	2024	Digitalization of ohe Blue Economy: Conceptual Paper for the Development of ohe Global Halal Hub in Indonesia
197	Report	Andri Rianawati;Noviaty Kresna Darmasetiawan;Faizal Susilo Hadi;Joshua Oktavianus;Carissa Avelinda Utama;	2023	Enhancement of Indonesia’s blue economy sector through innovation and competitive advantage based on Resource-Based View theory
198	Journal Article	Donesia, Erik Aprilian;Widodo, Pujo;Saragih, Herlina Juni Risma;Suwarno, Panji;	2023	Konsep Blue Economy Dalam Pengembangan Wilayah Pesisir dan Wisata Bahari di Indonesia
199	Journal Article	Kardi, Cening;Vipriyanti, Nyoman Utari;Amrita, Anak Agung Ngurah;	2023	Learning Model for Developing Eco-Marine-Tourism with Blue Economy-Oriented in Gerokgak District of North Bali-Indonesia
200	Journal Article	Renur, Amin N;Fahrudin, Achmad;Kusumastanto, Tridoyo;Solihin, Dadang;	2019	Ocean economy and regional development of Maluku Province, Indonesia
201	Journal Article	Aryo Sahid Sujiwo;Nurlaili;	2023	Pengembangan Tata Kelola Ekonomi Biru Untuk Memperkuat Blue Economy Development Index di Indonesia
202	Journal Article	Nasution, Marihot;	2022	Potensi dan tantangan blue economy dalam mendukung pertumbuhan ekonomi di Indonesia: kajian literatur
203	Conference Proceedings	Naranta, Enno Haya Gladya;	2024	Dynamics and Challenges of Implementing the Concepts of Green Economy and Blue Economy in Facing Climate Change in Indonesia
204	Journal Article	Pasaribu, Iwan Fadli;Nur Aniza Aprillia;Trifena Priskila Br Purba; Nanda Teguh Junianto; Nadya Andriani; Suryanusaciptaning Akbar; Wiranti; Nico Mulia Subekti	2024	Case study of the application of the blue economy in making coral reefs a business commodity on Pari Island, Indonesia
205	Journal Article	Sarjito, Aris;	2024	Sailing Towards Excellence: Revamping the Education Policy to Foster Maritime Leadership in Indonesia
206	Journal Article	Bengen, Dietriech G;Fauzi, Akhmad;Suntoyo, Akhmad Fauzi;Trenggono, Sakti Wahyu;Holiludin, Noor Cahyo D Aryanto;Sudianto, Arief;Sukarno, Deky R;Lovandika, Naufal S;Simbolon, Surya A;Suharyanto, Victor Gustaaf Manoppo;	2024	Use of the TOPSIS-Entropy-GIS Method and Evaluation of the Sustainability of Carrying Capacity of Marine Waters to Determine Blue Economy Strategy Priorities in Indonesia
207	Journal Article	Balaka, Muh Yani;Muthalib, Abd Azis;Kasim, Safril;Putera, Asrip;Bahari, Samsul;Ega, Abdul Aman;Mukaddas, Jamal;	2023	Future blue economy policy model based on balance of fisheries and maritime sectors with mining to achieve sustainable economic growth in Eastern Indonesia
208	Journal Article	Razladova, Oksana;Nyoko, Antonio EL;	2022	Blue Economy Development In Indonesia
209	Journal Article	Agung, Hario Istiqlal;Almubaroq, Hikmat Zakky;	2022	Marine Policy in Holding and Handling Marine Natural Asset as An Attempt to Recognize Indonesia as The Sector’s Maritime Axis
210	Journal Article	Setiadi, Tatak;Habil, Nur Ilman;	2022	Rancangan Strategi Kebijakan Bisnis Maritim Indonesia dalam Era Society 5.0
211	Journal Article	Chandra, Yundari Amelia;Rustam, Ismah;Safitri, Purnami;	2021	Implementasi Kebijakan Berbasis Blue Economy Dalam Kerangka Kerja Sama Pemerintah Indonesia Dengan Food And Agriculture Organization (FAO): Studi Mengenai Unit Pengolahan Ikan (UPI) Di Kabupaten Lombok Utara
212	Journal Article	Djunarsjah, E.;Handayani, M.;	2021	Integration of marine spatial objects management to support toward sustainable maritime policy development
213	Journal Article	Darmawan, E;Harimas Ginting, A;	2020	Tata Kelola Kebijakan Maritim di Indonesia dalam Perspektif Sound Governance
214	Journal Article	Rafiy, Muhammad;Adam, Pasrun;	2019	The study on local government policy in development of marine-based industry in South Konawe Regency of Southeast Sulawesi, Indonesia
215	Report	Bappenas-RI	2023	Laporan Kajian Lingkungan Hidup Strategis (KLHS) Rencana Pembangunan Jangka Panjang Nasional (RPJPN) 2025-2045
216	Report	Bappenas-RI	2023	Penduduk Berkualitas Menuju Indonesia Emas: Kebijakan Kependudukan Indonesia 2020–2050
217	Report	BPS	2023	Proyeksi Penduduk Indonesia 2020–2050 Hasil Sensus Penduduk 2020
218	Report	CMMAI-RI, UNDP	2022	Blue Financing Strategic Document
219	Report	Margaretha Quina;Stephanie Juwana;Harimuddin;Gridanya Laidha;Gabriella Gianova;Anissa Amalia;Harish Makarim;Beby Pane;Rayhan Dudayev;Mas Achmad Santosa	2022	Fishers and Ocean Justice: A Study on the Implementation of the Fishers Protection Law and the Coastal Areas and Small Islands Management Law in Seven Locations in Indonesia
220	Report	Christy Desta Pratama;Derry Wanta;Neel Inamdar;David Adeyemi Aromokeye;Edgar Ekaputra;Jakfar Hari Putra;Baudouin Marie Jean Joseph Gosselin;Rhona Bar	2022	Indonesia Blue Finance Policy Note
221	Report	CMMAI-RI	2022	Laporan Tahunan 2021
222	Report	Bappenas-RI, LCDI	2021	Executive Summary - Climate Resilience Development Policy 2020-2045
223	Report	World Bank	2021	Oceans for Prosperity: Reforms for a Blue Economy in Indonesia
224	Report	OECD	2021	Sustainable Ocean Economy Country Diagnostics of Indonesia
225	Report	Bappenas-RI	2020	Laporan Kajian Lingkungan Hidup Strategis (KLHS) Rencana Pembangunan Jangka Menengah Nasional (RPJMN) 2020-2024
226	Report	World Bank	2019	Indonesia Economic Quarterly (IEQ): Oceans of Opportunity
227	Report	Kryspin-Watson, Jolanta;Vun, Yong Jian;Stanton-Geddes, Zuzana;Semadeni, Gian Sandosh	2019	Strengthening the Disaster Resilience of Indonesian Cities – A Policy Note
228	Report	Bappenas-RI	2018	Kaji Ulang RAN API 2018 Proyeksi Iklim Laut
229	Report	CMMAI-RI	2018	Potret Keberhasilan Program Prioritas Tahun 2015-2018
230	Report	DG-SANTE	2017	Final Report of An Audit Carried Out in Indonesia from 28 February 2017 to 09 March 2017 in order to Evaluate the Control Systems in Place Governing the Production of Fishery Products Derived from Tuna Species Intended for Export to the European Union
231	Report	CMMAI-RI	2016	Laporan Tahunan 2016
232	Report	MMAF-RI, DEKIN	2012	Kebijakan Ekonomi Kelautan Dengan Model Ekonomi Biru
233	Web Page	OHI	2024	2023 OHI Assessment - Indonesia
234	Web Page	I Made Andi Arsana	2023	Era Baru Batas Maritim Indonesia Malaysia
235	Web Page	Zuzy Anna	2023	Unlocking Indonesia’s potential through a blue economy
236	Web Page	Indonesia.Go.Id	2019	Dulu Bangsa Indonesia Adalah Bangsa Maritim
237	Web Page	Indonesia.Go.Id	2019	Indonesia Poros Maritim Dunia
238	Web Page	Arif Havas Oegroseno	2017	Indonesia's Ocean Policy Presentation
